# Supplementary material for: Differential Activation of ERK Signaling in HPV-Related Oropharyngeal Squamous Cell Carcinoma
Source: MDPI journal article supplement (doi:10.3390/cancers11040584), 2019-04-25
Supplement: s1 [file s1]

# Supplementary Materials: Differential Activation of ERK Signaling in HPV-Related Oropharyngeal Squamous Cell Carcinoma

Chao Rong, Marie Muller, Christa Flechtenmacher, Dana Holzinger, Gerhard Dyckhoff, Olcay Cem Bulut, Dominik Horn, Peter Plinkert, Jochen Hess and Annette Affolter

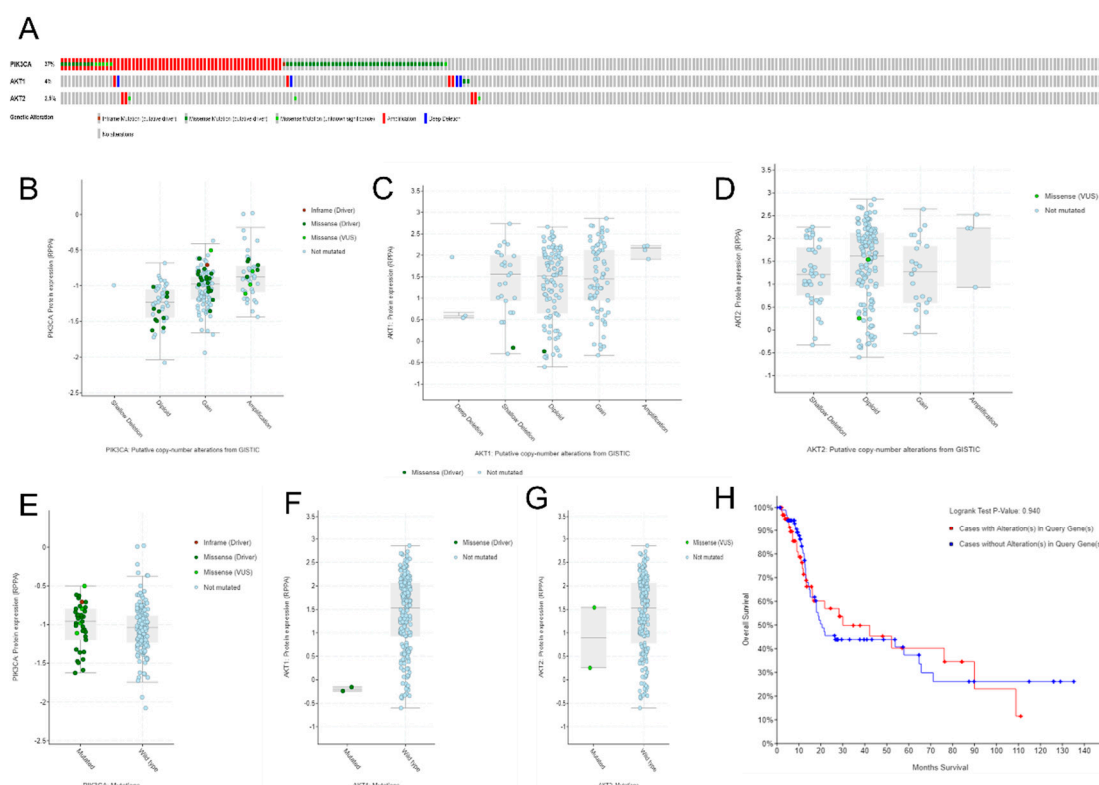

**Figure S1.** Genomics analysis of PI3k/AKT in HNSCC by the cBio Cancer Genomics Portal. (A) OncoPrint indicates the frequency (%) of alterations for PIK3CA, AKT1 and AKT2 genes in the TCGA-HNC cohort ( $n = 191$ ), based on whole-exome sequencing data (<http://www.cbioportal.org/>). The boxplots show the association of protein levels and copy number variations as well as mutation status in PIK3CA (B,E), AKT1 (C,F) and AKT2 (D,G) genes. Differences in overall survival between subgroups with or without alterations in PIK3CA, AKT1&2 genes are plotted by Kaplan-Meier graph (H).

**Table S1.** analysis for pERK1/2 and pAKT (Ser473) expression and clinicopathological features ( $n = 109$ ).

| Clinicopathological Features | pERK1/2 <sup>high</sup> | pAKT <sup>high</sup> | Others | p-Value |
|------------------------------|-------------------------|----------------------|--------|---------|
| Age(years)                   |                         |                      |        |         |
| <58                          | 19                      |                      | 32     | 0.494   |
| ≥58                          | 18                      |                      | 40     |         |
| Gender                       |                         |                      |        |         |
| Male                         | 25                      |                      | 56     | 0.248   |
| Female                       | 12                      |                      | 16     |         |
| TNM status                   |                         |                      |        |         |
| T1/T2                        | 17                      |                      | 32     | 0.881   |
| T3/T4                        | 20                      |                      | 40     |         |

|                    |    |    |       |
|--------------------|----|----|-------|
| N0                 | 7  | 16 | 0.689 |
| N+                 | 30 | 56 |       |
| Pathological Grade |    |    |       |
| G1/G2              | 19 | 38 | 0.420 |
| G3                 | 10 | 29 |       |
| missing            | 8  | 5  |       |
| Tobacco            |    |    |       |
| Never/former       | 8  | 20 | 0.486 |
| Current            | 29 | 52 |       |
| Alcohol            |    |    |       |
| Never/former       | 8  | 14 | 0.789 |
| Current            | 29 | 58 |       |
| HPV                |    |    |       |
| HPV-               | 31 | 51 | 0.247 |
| HPV+               | 6  | 18 |       |
| missing            |    | 3  |       |
| Therapy            |    |    |       |
| RT                 | 31 | 65 | 0.322 |
| Non-RT             | 6  | 7  |       |

RT: Radiotherapy.

**Table S2.** Cox regression analysis of progression-free and disease-specific survival for OPSCC patients ( $n = 109$ ).

| Factors                                                      | PFS                |                 | DSS                |                 |
|--------------------------------------------------------------|--------------------|-----------------|--------------------|-----------------|
|                                                              | HR (95% CI)        | <i>p</i> -Value | HR (95% CI)        | <i>p</i> -Value |
| Age(years)<br>≥58 vs. <58                                    | 0.961(0.583–1.583) | 0.876           | 1.064(0.619–1.830) | 0.822           |
| Gender<br>male vs. female                                    | 1.379(0.746–2.549) | 0.305           | 1.708(0.858–3.403) | 0.128           |
| T status<br>T3–4 vs. T1–2                                    | 1.881(1.116–3.171) | <b>0.018</b>    | 2.293(1.272–4.132) | <b>0.006</b>    |
| N status<br>N+ vs. N0                                        | 1.384(0.736–2.602) | 0.313           | 2.064(0.971–4.385) | 0.060           |
| pathological Grade<br>G3 vs. G1–2                            | 0.742(0.413–1.334) | 0.319           | 0.750(0.393–1.433) | 0.384           |
| Tobacco<br>Current vs. Never/former                          | 3.359(1.596–7.072) | <b>0.001</b>    | 2.861(1.290–6.341) | <b>0.010</b>    |
| Alcohol<br>Current vs. Never/former                          | 1.071(0.558–2.056) | 0.837           | 1.090(0.548–2.171) | 0.806           |
| HPV status<br>Driven vs. Non-driven                          | 0.339(0.146–0.789) | <b>0.012</b>    | 0.423(0.181–0.990) | <b>0.047</b>    |
| Therapy<br>RT vs. Non-RT                                     | 1.220(0.555–2.680) | 0.620           | 2.029(0.732–5.626) | 0.174           |
| p-AKT <sup>high</sup><br>High vs. Low                        | 1.117(0.673–1.856) | 0.668           | 1.220(0.700–2.124) | 0.483           |
| p-ERK1/2 <sup>high</sup> p-AKT <sup>high</sup><br>vs. others | 1.686(1.009–2.817) | <b>0.046</b>    | 1.745(1.006–3.028) | <b>0.048</b>    |

HR, hazard ratio; CI, confidence intervals; Statistically significant values are represented in bold.

**Table S3.** Multivariate Cox regression analysis of progression-free and disease-specific survival for OPSCC patients ( $n = 109$ ).

| Factors                                                      | PFS                |                 | DSS                |                 |
|--------------------------------------------------------------|--------------------|-----------------|--------------------|-----------------|
|                                                              | HR (95% CI)        | <i>p</i> -Value | HR (95% CI)        | <i>p</i> -Value |
| T status<br>T3–4 vs. T1–2                                    | 1.748(1.028–2.973) | <b>0.039</b>    | 2.114(1.160–3.852) | <b>0.014</b>    |
| Tobacco<br>Current vs. Never/former                          | 2.725(1.276–5.819) | <b>0.010</b>    | 2.371(1.055–5.327) | <b>0.037</b>    |
| HPV status<br>Driven vs. Non-driven                          | 0.464(0.197–1.097) | 0.080           | 0.577(0.241–1.382) | 0.217           |
| p-ERK1/2 <sup>high</sup> p-AKT <sup>high</sup><br>vs. others | 1.400(0.830–2.362) | 0.207           | 1.338(0.758–2.361) | 0.315           |

HR, hazard ratio; CI, confidence intervals; Statistically significant values are represented in bold.

**Table S4.** Multivariate Cox regression analysis of progression-free and disease-specific survival for OPSCC patients ( $n = 109$ ).

| Factors                             | PFS                |                 | DSS                |                 |
|-------------------------------------|--------------------|-----------------|--------------------|-----------------|
|                                     | HR (95% CI)        | <i>p</i> -Value | HR (95% CI)        | <i>p</i> -Value |
| T status<br>T3–4 vs. T1–2           | 1.826(1.067–3.125) | <b>0.028</b>    | 2.126(1.158–3.903) | <b>0.015</b>    |
| Tobacco<br>Current vs. Never/former | 3.214(1.522–6.787) | <b>0.002</b>    | 2.620(1.178–5.828) | <b>0.018</b>    |
| p-AKT<br>High vs. Low               | 1.064(0.630–1.798) | 0.816           | 1.098(0.621–1.942) | 0.748           |
| p-ERK1/2<br>High vs. Low            | 2.067(1.204–3.550) | <b>0.008</b>    | 1.855(1.038–3.315) | <b>0.037</b>    |

HR, hazard ratio; CI, confidence intervals; Statistically significant values are represented in bold.

**Table S5.** pERK1/2 and pAKT(Ser473) expression distribution in HPV negative and positive OPSCC patients.

| Expression Distribution       | HPV–                   |                         | HPV+                   |                         |
|-------------------------------|------------------------|-------------------------|------------------------|-------------------------|
|                               | pERK1/2 <sup>low</sup> | pERK1/2 <sup>high</sup> | pERK1/2 <sup>low</sup> | pERK1/2 <sup>high</sup> |
| pAKT (Ser473) <sup>low</sup>  | 15                     | 22                      | 5                      | 0                       |
| pAKT (Ser473) <sup>high</sup> | 14                     | 31                      | 13                     | 6                       |

**Table S6.** Descriptive analysis of clinicopathological features of OPSCC cohort, treated between 1990 and 2008 in Heidelberg ( $n = 124$ ).

| Clinicopathological Feature | No of Patients (%) |
|-----------------------------|--------------------|
| Age(years)                  |                    |
| ≥58                         | 58 (46.8)          |
| <58                         | 66 (53.2)          |
| Sex                         |                    |
| Male                        | 93 (75.0)          |
| Female                      | 31 (25.0)          |
| Tobacco use                 |                    |
| Never/Former                | 32 (25.8)          |
| Current                     | 92 (74.2)          |
| Alcohol use                 |                    |
| Never/Former                | 29 (23.4)          |
| Current                     | 95 (76.6)          |
| Tumor size (T)              |                    |
| T1-2                        | 59 (47.6)          |
| T3-4                        | 64 (51.6)          |

|                                          |            |
|------------------------------------------|------------|
| missing                                  | 1 (0.8)    |
| Lymph node metastasis (N)                |            |
| N0                                       | 29 (23.4)  |
| N+                                       | 94 (75.8)  |
| missing                                  | 1 (0.8)    |
| HPV16                                    |            |
| HPV-non driven                           | 92 (74.2)  |
| HPV-driven                               | 29 (23.4)  |
| n/a (missing)                            | 3 (2.4)    |
| Localization                             |            |
| Tonsils                                  | 60 (48.4)  |
| Tongue base                              | 21 (16.9)  |
| Soft palate/ Uvula/palatoglossal fold    | 23 (18.5)  |
| Extending several anatomic regions       | 19 (15.3)  |
| Oropharynx NOS (not otherwise specified) | 1 (0.8)    |
| Treatment                                |            |
| No radiotherapy                          | 16 (12.9)  |
| Radiotherapy                             | 108 (87.1) |

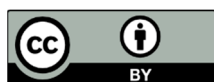

© 2019 by the authors. Licensee MDPI, Basel, Switzerland. This article is an open access article distributed under the terms and conditions of the Creative Commons Attribution (CC BY) license (<http://creativecommons.org/licenses/by/4.0/>).
